# Supplementary material for: Polyaspartamide-based multi-responsive micelle with sheddable shell for antitumor drug delivery
Source: Royal Society of Chemistry journal article supplement (doi:10.1039/c6ra23173j), 2016-01-01
Supplement: c6ra23173j1.pdf [file c6ra23173j1.pdf]

## Supporting Information

### Polyaspartamide-Based Multi-responsive Micelle with Sheddable Shell for Antitumor Drug Delivery

Lei Wang, Jie Luan, Lina Du, Le Li, Jia Liu, Zhilan Liu\*, Renxi Zhuo

Key Laboratory of Biomedical Polymers of Ministry of Education and Department of  
Chemistry, Wuhan University, Wuhan 430072, China

\*Corresponding author. E-mail: (liuzl@whu.edu.cn)

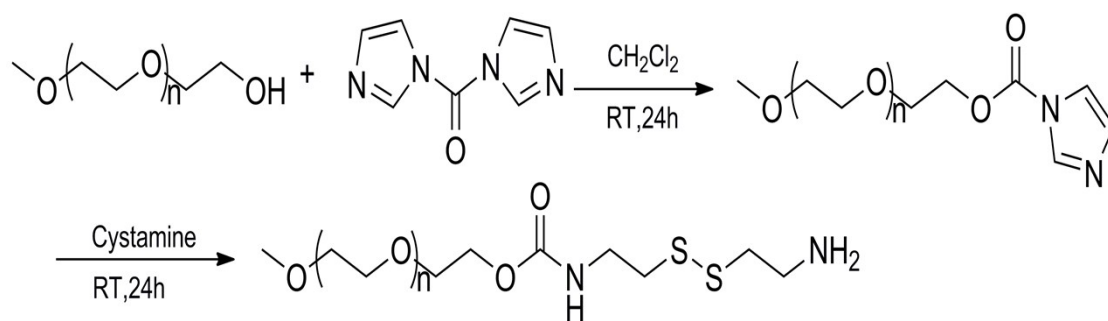

**Scheme S1.** Synthesis of mPEG-SS-NH<sub>2</sub>.

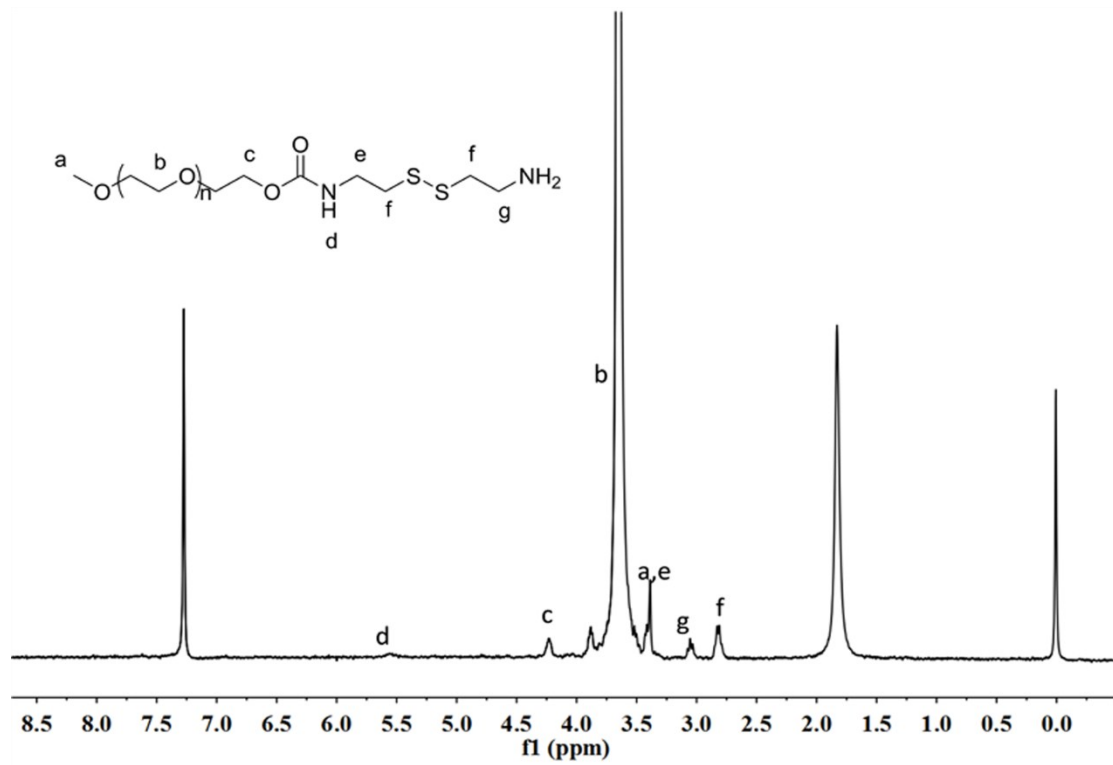

**Figure S1.** <sup>1</sup>H NMR(CDCl<sub>3</sub>) spectrum of mPEG-SS-NH<sub>2</sub>.

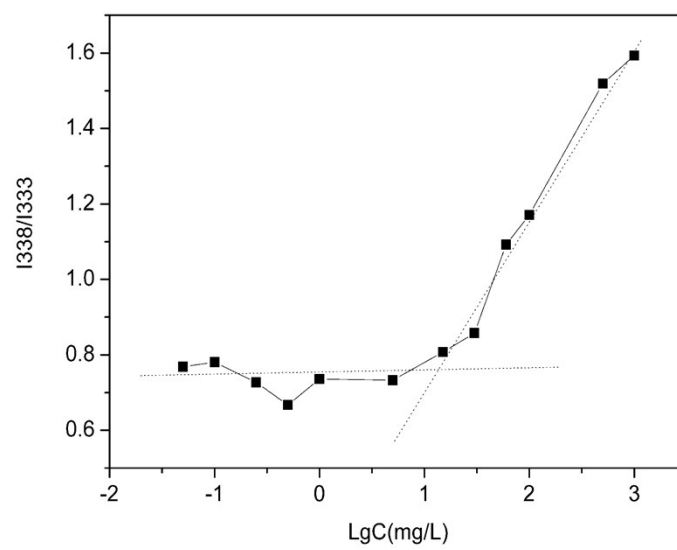

**Figure S2.** Determination of CMC for the polymer micelle.

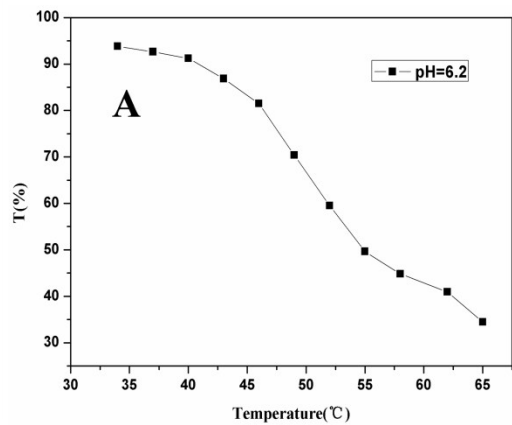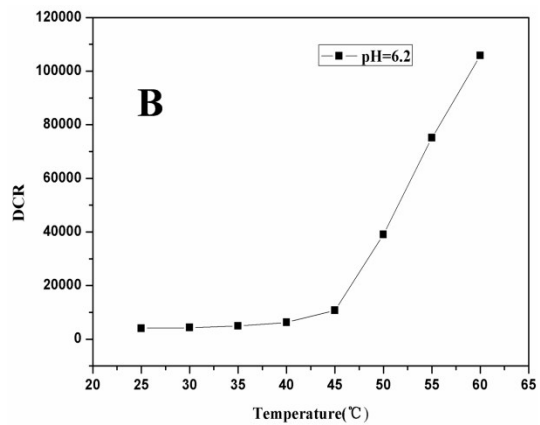

**Figure S3.** Transmittance and Intensity of scattered light of polymer solution
